# Supplementary material
Source: publisher site journal article supplement (https://www.spandidos-publications.com/7114/downloadSupplementary)
Supplement: Supplementary file 1 [file downloadSupplementary]

Table SI. Comparison of the general data among the three patient groups.

| Variable                             | Healthy<br>(n=23) | Sepsis<br>(n=30)  | SIC<br>(n=33)   | P-value |
|--------------------------------------|-------------------|-------------------|-----------------|---------|
| Weight, kg                           | 14.87±10.17       | 11.00 (6.3)       | 11.50 (14.00)   | 0.946   |
| Temperature, °C                      | 37.55±1.16        | 37.00 (1.30)      | 37.63±1.27      | 0.415   |
| Respiration, bpm                     | 28.50 (10.25)     | 37.00 (21.06)     | 30.00 (20.00)   | 0.687   |
| Heart rate <sup>a</sup>              | 124.68±24.45      | 140.41±26.93      | 136.35±27.13    | <0.05   |
| WBC, 10 <sup>9</sup> /l <sup>b</sup> | 7.32 (1.65)       | 14.70 (13.83)     | 11.06 (17.21)   | <0.01   |
| Hb, g/l <sup>c</sup>                 | 128.96±10.04      | 106.00 (19.30)    | 110.00 (26.00)  | <0.001  |
| PLT, 10 <sup>9</sup> /l              | 291.22±90.02      | 290.21±149.58     | 242.50 (291.00) | 0.558   |
| ALT, U/l <sup>c</sup>                | 14.00 (4.00)      | 24.50 (44.30)     | 37.00 (59.50)   | <0.001  |
| AST, U/l <sup>b</sup>                | 32.00 (9.00)      | 29.50 (53.00)     | 52.50 (78.00)   | <0.01   |
| TBIL, mM <sup>b</sup>                | 6.20 (1.10)       | 4.75 (6.30)       | 8.75 (9.80)     | <0.01   |
| ALB, g/l <sup>c</sup>                | 45.51±2.82        | 35.17±6.67        | 32.00±6.99      | <0.001  |
| BUN/UREA, mM <sup>c</sup>            | 4.56±0.68         | 3.10 (1.78)       | 5.38 (4.91)     | <0.001  |
| CREA, μM <sup>a</sup>                | 32.00 (15.00)     | 28.00 (14.50)     | 40.00 (50.30)   | <0.05   |
| URCA, μM <sup>a</sup>                | 261.00 (69.00)    | 218.50 (139.80)   | 265.00 (273.50) | <0.05   |
| CRP, mg/l                            | --                | 64.00 (89.77)     | 34.00 (67.00)   | 0.301   |
| PCT, ng/l                            | --                | 3.00 (24.08)      | 5.93 (30.02)    | 0.172   |
| Mb, ng/ml <sup>d</sup>               | --                | 19.32 (24.85)     | 31.26 (306.09)  | <0.001  |
| cTnI, ng/ml <sup>e</sup>             | --                | 0.01 (0.01)       | 0.15 (0.40)     | <0.05   |
| BNP, pg/ml <sup>e</sup>              | --                | 16.59 (38.59)     | 192.31 (301.19) | <0.05   |
| CK-Mb, ng/ml                         | --                | 1.00 (1.99)       | 3.51 (7.93)     | 0.138   |
| LDH, U/l                             | --                | 2,832.50 (395.00) | 296.00 (252.00) | 0.532   |

<sup>a</sup>P<0.05 (Healthy vs. Sepsis vs. SIC), <sup>b</sup>P<0.01(Healthy vs. Sepsis vs. SIC), <sup>c</sup>P<0.001 (Healthy vs. Sepsis vs. SIC), <sup>d</sup>P<0.001(Sepsis vs. SIC), <sup>e</sup>P<0.05 (Sepsis vs. SIC). WBC, white blood cell; Hb, hemoglobin; PLT, platelet; ALT, alanine transaminase; AST, aspartate aminotransferase; TBIL, total bilirubin; ALB, albumin; BUN/UREA; the ratio of blood urea nitrogen and urea levels; CREA, creatinine; URCA, uric acid; CRP, C-reactive protein; PCT, procalcitonin; Mb, myoglobin; cTnI, cardiac troponin I; BNP, brain natriuretic peptide; CK-Mb, creatine kinase-MB; LDH, lactate dehydrogenase.
